# Supplementary material for: Separation and mesogenic properties of tetraalkoxy-substituted phthalocyanine isomers
Source: Royal Society of Chemistry journal article supplement (doi:10.1039/b600196c), 2006-01-01
Supplement: b600196c.pdf [file b600196c.pdf]

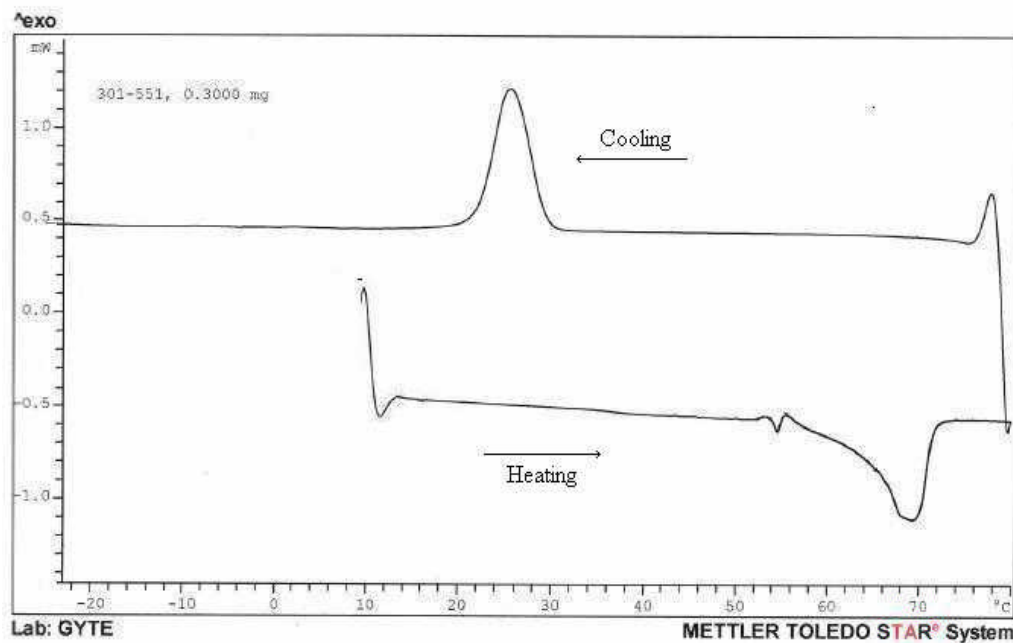

**Figure S1.** DSC thermogram of  $C_{4h}$  isomer of the non-peripheral Ni(II) phthalocyanine for the first heating and cooling cycle. Endotherm peak is pointing downwards.

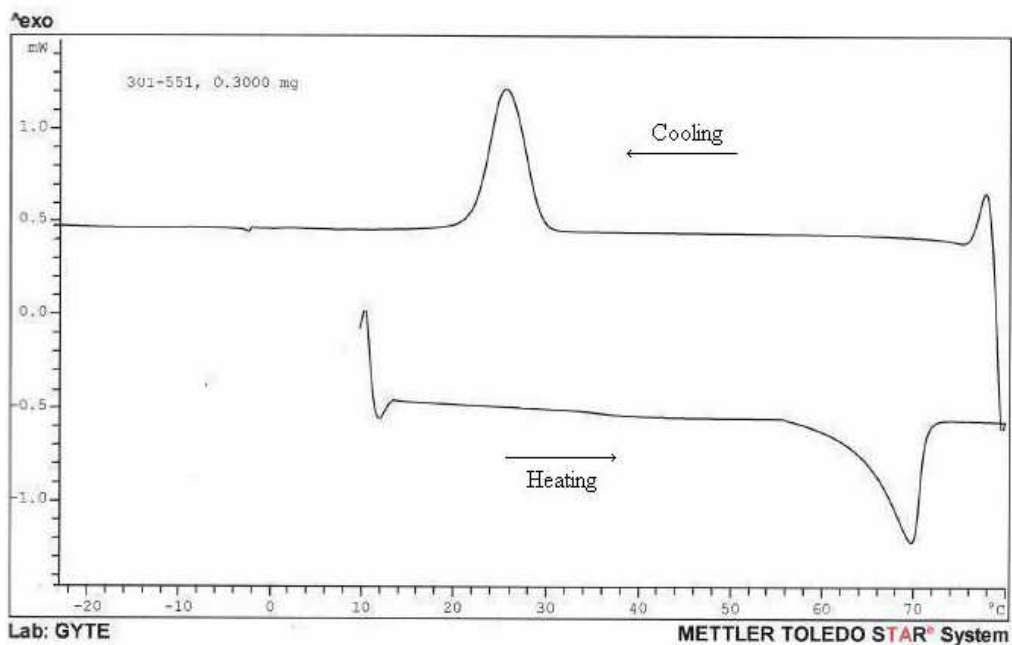

**Figure S2.** DSC thermogram of  $C_{4h}$  isomer of the non-peripheral Ni(II) phthalocyanine for the second heating and cooling cycle. Endotherm peak is pointing downwards.

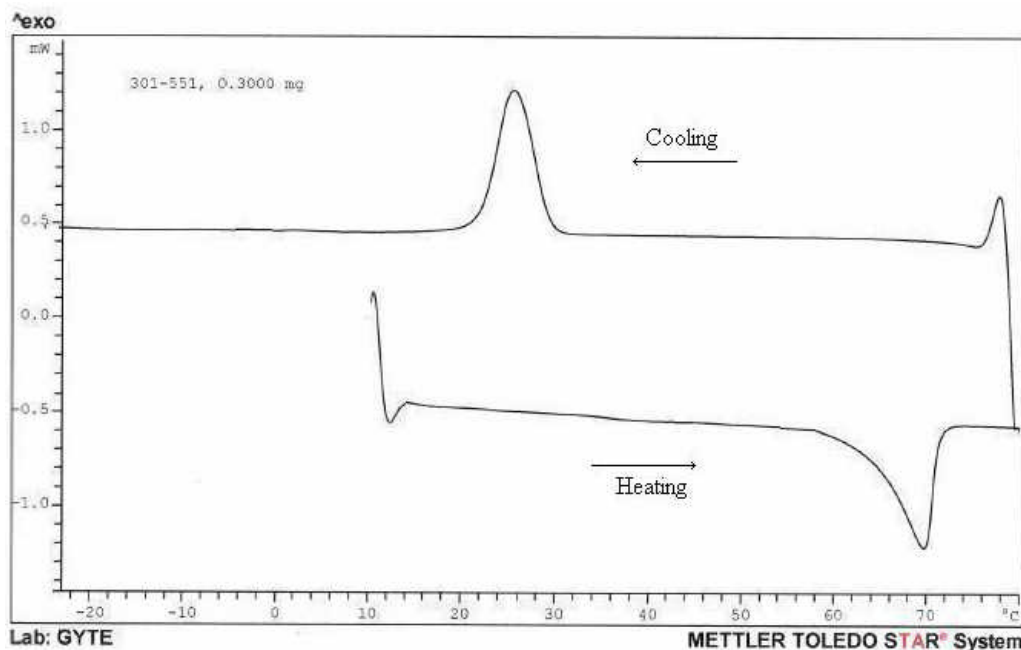

**Figure S3.** DSC thermogram of  $C_{4h}$  isomer of the non-peripheral Ni(II) phthalocyanine for the third heating and cooling cycle. Endotherm peak is pointing downwards.

**Table S1.** Phase transition temperatures(°C) and in parentheses enthalpy changes  $\Delta H$  (in  $\text{kJ}\cdot\text{mol}^{-1}$ ) by DSC (heating and cooling rates are  $10\text{ }^\circ\text{C}\cdot\text{min}^{-1}$ ) for  $C_{4h}$  isomer of the non-peripheral Ni(II) phthalocyanine

| Heating/Cooling Cycles | Heating<br>$\text{Col}_{\text{ho}} \rightarrow \text{I}$ | Cooling<br>$\text{I} \rightarrow \text{Col}_{\text{ho}}$ |
|------------------------|----------------------------------------------------------|----------------------------------------------------------|
| 1 <sup>st</sup>        | 69 (152.23)                                              | 26 (151.75)                                              |
| 2 <sup>nd</sup>        | 70 (150.22)                                              | 26(153.83)                                               |
| 3 <sup>rd</sup>        | 71 (153.25)                                              | 26 (152.86)                                              |

$\text{Col}_{\text{ho}}$  = hexagonal ordered columnar mesophase; I = isotropic phase
